# Supplementary material
Source: ML conference proceedings conference paper supplement (https://openaccess.thecvf.com/content/ICCV2021/html/Zhu_Mitigating_Intensity_Bias_ICCV_2021_paper.html)
Supplement: Supplementary file 1 [file Zhu_Mitigating_Intensity_Bias_ICCV_2021_supplemental.pdf]

# Mitigating Intensity Bias in Shadow Detection via Feature Decomposition and Reweighting

Lei Zhu<sup>1</sup> Ke Xu<sup>2†</sup> Zhanghan Ke<sup>1</sup> Rynson W.H. Lau<sup>1†</sup>

<sup>1</sup>City University of Hong Kong <sup>2</sup>Shanghai Jiao Tong University

lzhu68-c@my.cityu.edu.hk, kkangwing@gmail.com, zhanghake2-c@my.cityu.edu.hk, Rynson.Lau@cityu.edu.hk

## 1. Overview

In this supplementary material, we first provide more qualitative comparison results with latest state-of-the-art methods, including DSC [2], ADNet [3], BDRAR [10], DSD [7], MTMT [1], and ITSD [8], on the SBU [5] (Fig. 1), UCF [9] (Fig. 2), and ISTD [6] (Fig. 3) test sets. Then, we visualize intermediate features  $\mathbf{F}$ ,  $\mathbf{F}_i$ ,  $\mathbf{F}_v$  and  $\mathbf{F}_r$  (*i.e.*, features before decomposition, intensity-invariant features, intensity-variant features and reweighted features), in Fig. 4. The feature visualization is performed via Grad-CAM [4].

## References

- [1] Zhihao Chen, Lei Zhu, Liang Wan, Song Wang, Wei Feng, and Pheng-Ann Heng. A multi-task mean teacher for semi-supervised shadow detection. In *CVPR*, 2020. 1, 2, 3, 4
- [2] Xiaowei Hu, Lei Zhu, Chi-Wing Fu, Jing Qin, and Pheng-Ann Heng. Direction-aware spatial context features for shadow detection. In *CVPR*, 2018. 1, 2, 3, 4
- [3] Hieu Le, Tomas F. Yago Vicente, Vu Nguyen, Minh Hoai, and Dimitris Samaras. A+d net: Training a shadow detector with adversarial shadow attenuation. In *ECCV*, 2018. 1, 2, 3, 4
- [4] Ramprasaath R Selvaraju, Michael Cogswell, Abhishek Das, Ramakrishna Vedantam, Devi Parikh, and Dhruv Batra. Grad-cam: Visual explanations from deep networks via gradient-based localization. In *ICCV*, pages 618–626, 2017. 1, 5
- [5] Tomás F Yago Vicente, Le Hou, Chen-Ping Yu, Minh Hoai, and Dimitris Samaras. Large-scale training of shadow detectors with noisily-annotated shadow examples. In *ECCV*, 2016. 1, 2
- [6] Jifeng Wang, Xiang Li, and Jian Yang. Stacked conditional generative adversarial networks for jointly learning shadow detection and shadow removal. In *CVPR*, 2018. 1, 4
- [7] Quanlong Zheng, Xiaotian Qiao, Ying Cao, and Rynson W.H. Lau. Distraction-aware shadow detection. In *CVPR*, 2019. 1, 2, 3, 4
- [8] Huajun Zhou, Xiaohua Xie, Jian-Huang Lai, Zixuan Chen, and Lingxiao Yang. Interactive two-stream decoder for accurate and fast saliency detection. In *CVPR*, 2020. 1, 2, 3, 4
- [9] Jiejie Zhu, Kegan GG Samuel, Syed Z Masood, and Marshall F Tappen. Learning to recognize shadows in monochromatic natural images. In *CVPR*, 2010. 1, 3
- [10] Lei Zhu, Zijun Deng, Xiaowei Hu, Chi-Wing Fu, Xuemiao Xu, Jing Qin, and Pheng-Ann Heng. Bidirectional feature pyramid network with recurrent attention residual modules for shadow detection. In *ECCV*, 2018. 1, 2, 3, 4

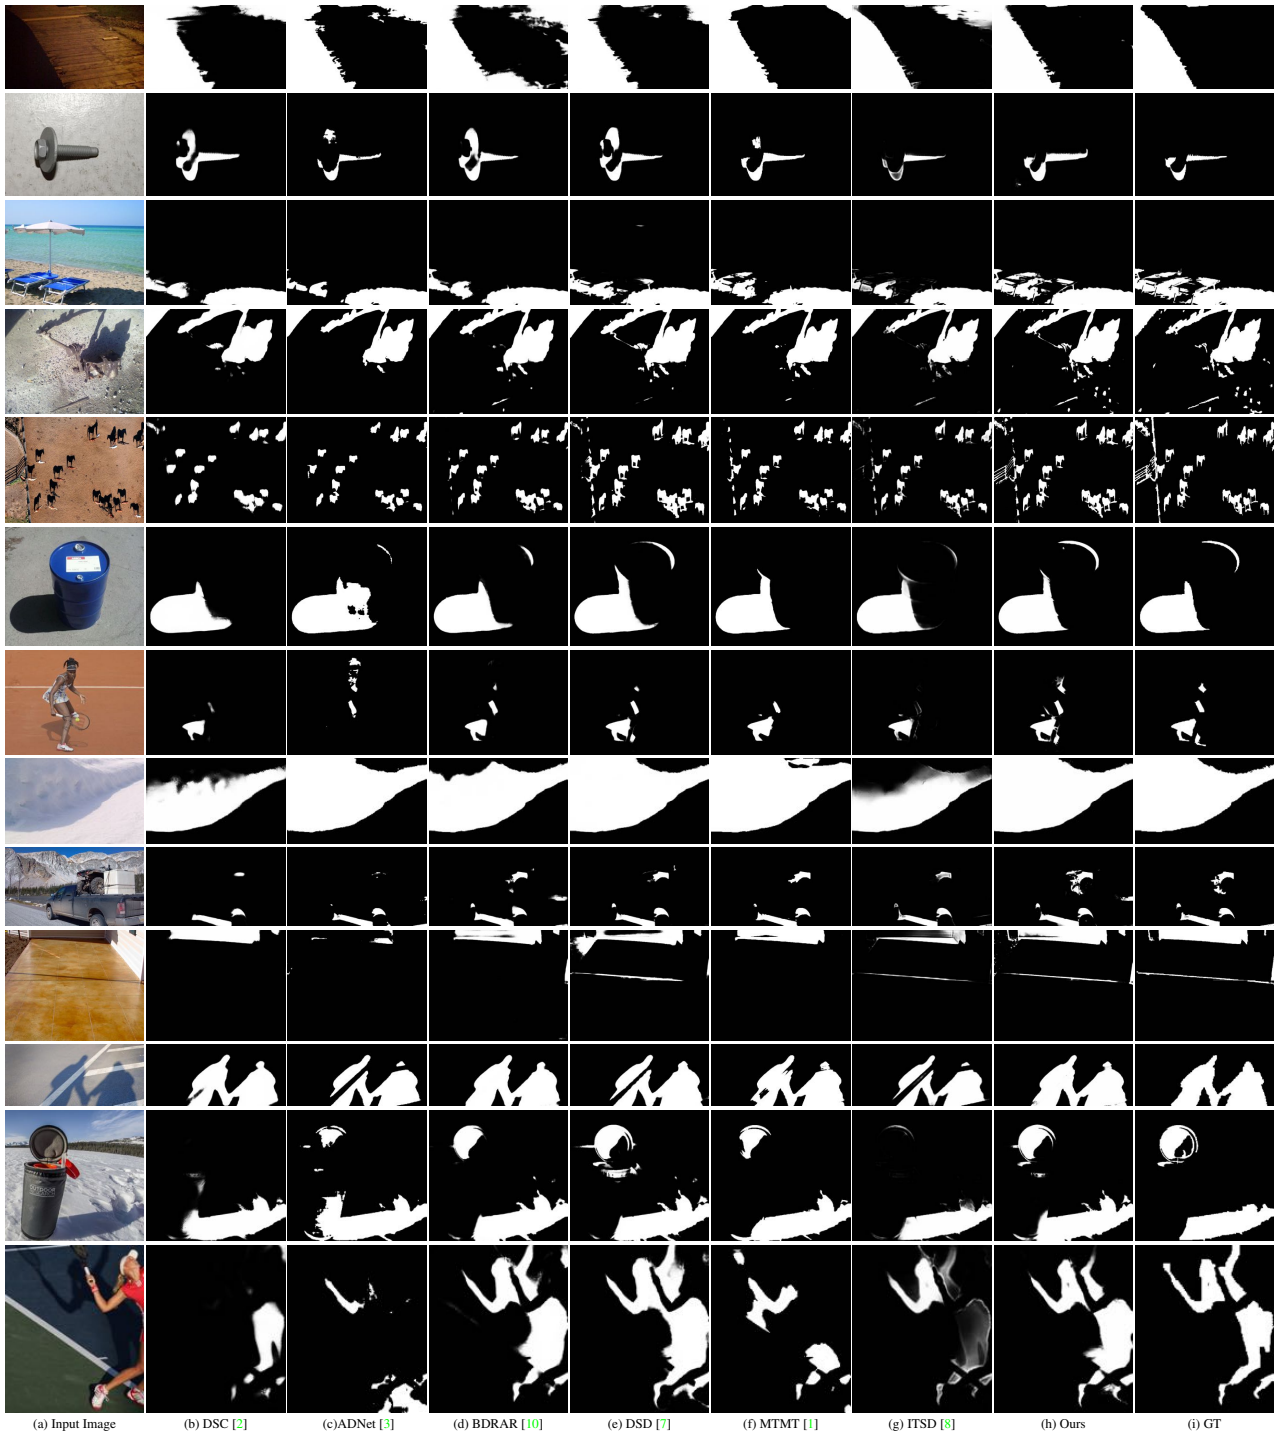

Figure 1. Qualitative comparisons of the proposed method with the most recent state-of-the-art methods on SBU[5] test set.

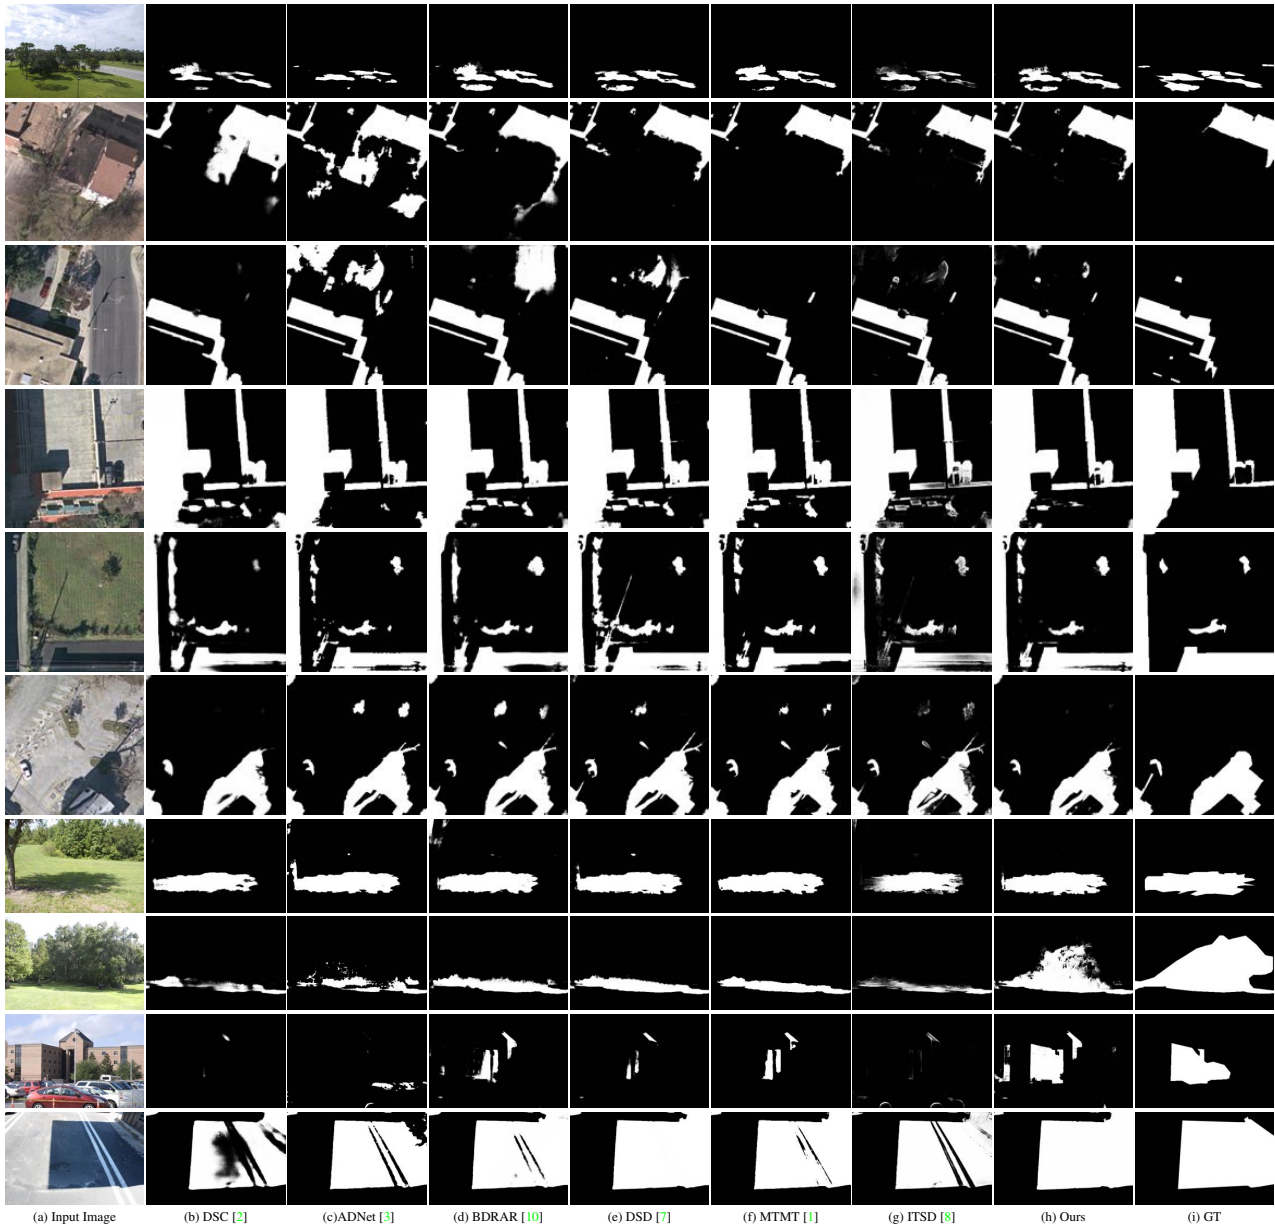

Figure 2. Qualitative comparisons of the proposed method with the most recent state-of-the-art methods on UCF[9] test set.

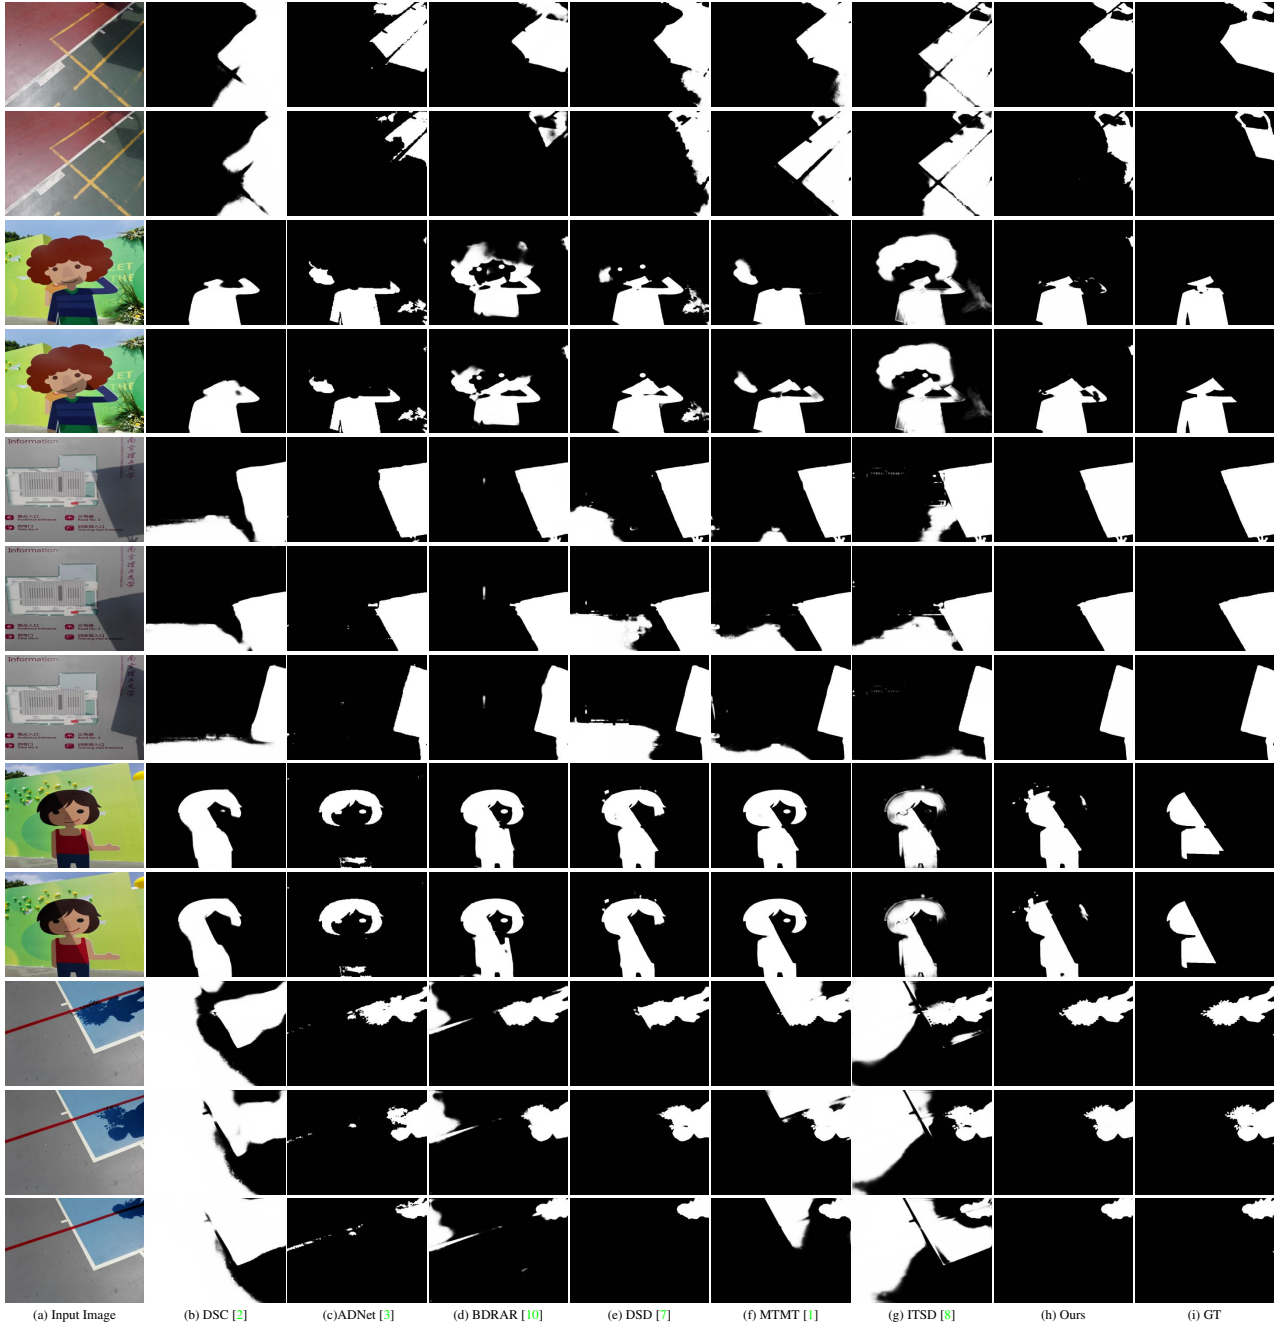

Figure 3. Qualitative comparisons of the proposed method with the most recent state-of-the-art methods on ISTD[6] test set.



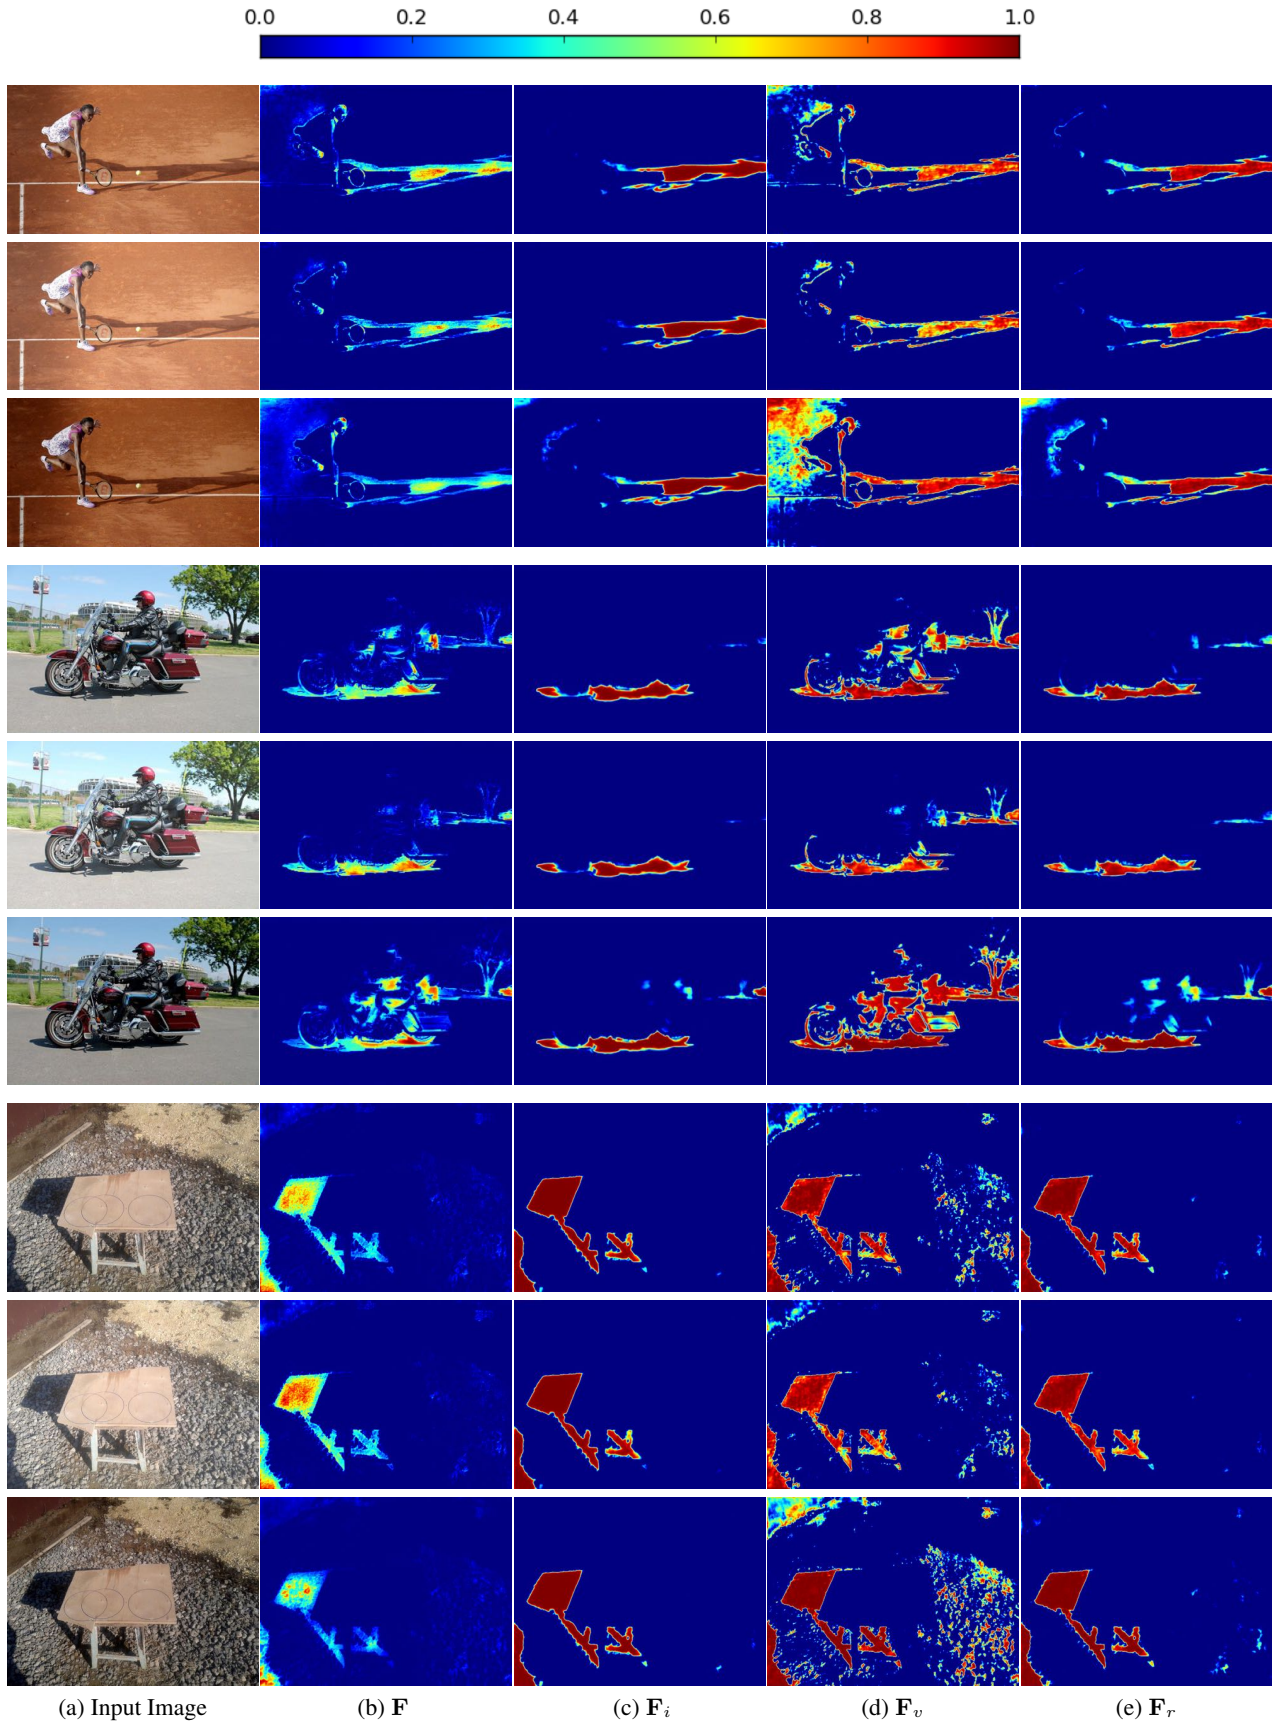

Figure 4. Feature map visualization using GradCAM [4]. In each example, we show the original image (top row), its brighter counterpart (second row) and its darker counterpart (third row). From left to right: (a) input image, (b)  $\mathbf{F}$ : features before decomposition, (c)  $\mathbf{F}_i$ : intensity-invariant features, (d)  $\mathbf{F}_v$ : intensity-variant features, (e)  $\mathbf{F}_r$ : recombined features.
